# Supplementary material
Source: PubMed Central journal article supplement (PMC10090481)
Supplement: mmc1.pdf [file mmc1.pdf]

**Supplemental information**

***In vivo* genome editing for hemophilia**

**B therapy by the combination of rebalancing  
and therapeutic gene knockin using a viral  
and non-viral vector**

**Jeong Hyeon Lee, Jeong Pil Han, Dong Woo Song, Geon Seong Lee, Beom Seok Choi, MinJeong Kim, Yeji Lee, Seokjoong Kim, Hyukjin Lee, and Su Cheong Yeom**

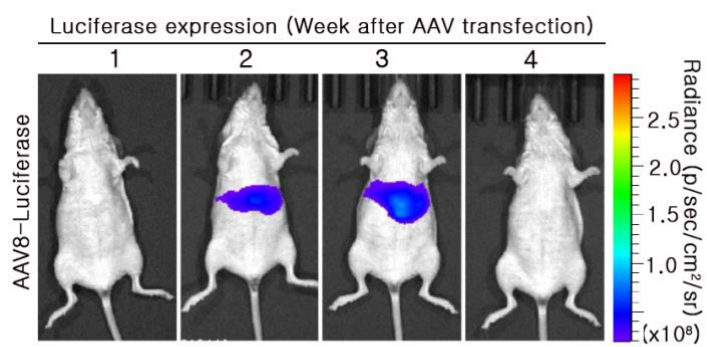

**Figure S1.**  $1 \times 10^{12}$  vg/kg of AAV8 -Luciferase was injected into a hairless mouse via tail vein, and time course *in vivo* imaging for luciferase was conducted. Images were acquired every week and normalized using the same exposure conditions. Luciferase intensity is shown as radiance (p/sec/cm<sup>2</sup>/sr).

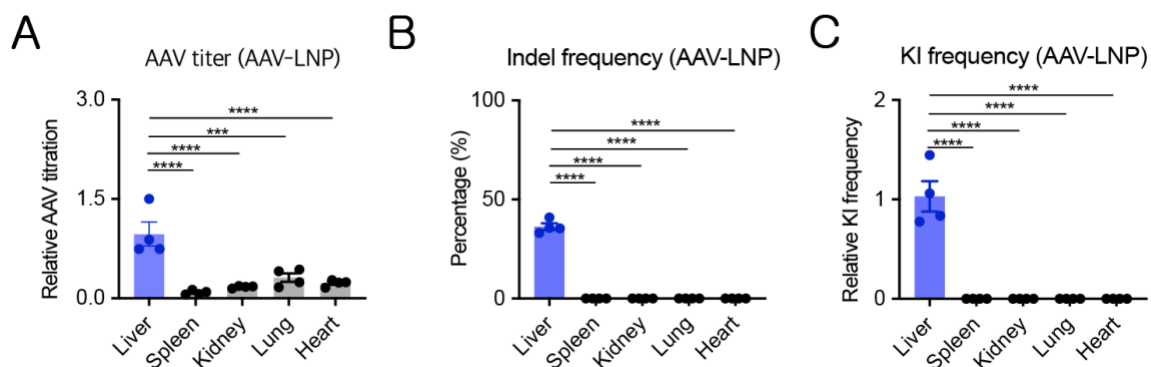

**Figure S2.** Measuring AAV copy number, indel rate, and KI frequency in mice from the AAV-LNP group. **A.** Relative AAV titer was calculated using qPCR for the ITR of AAVs. AAV titration of each organ was normalized to that of the liver. **B.** Indel analysis was conducted using T7E1 and image analysis. **C.** Relative KI frequency was calculated using qPCR in the 3' site of the expected KI locus. KI frequency of each organ was normalized to that of the liver. (n = 4 per group). Data are presented as mean ± standard error of mean, calculated using one-way ANOVA. (\*\*\*:  $p < 0.001$  and \*\*\*\*:  $p < 0.0001$ .)

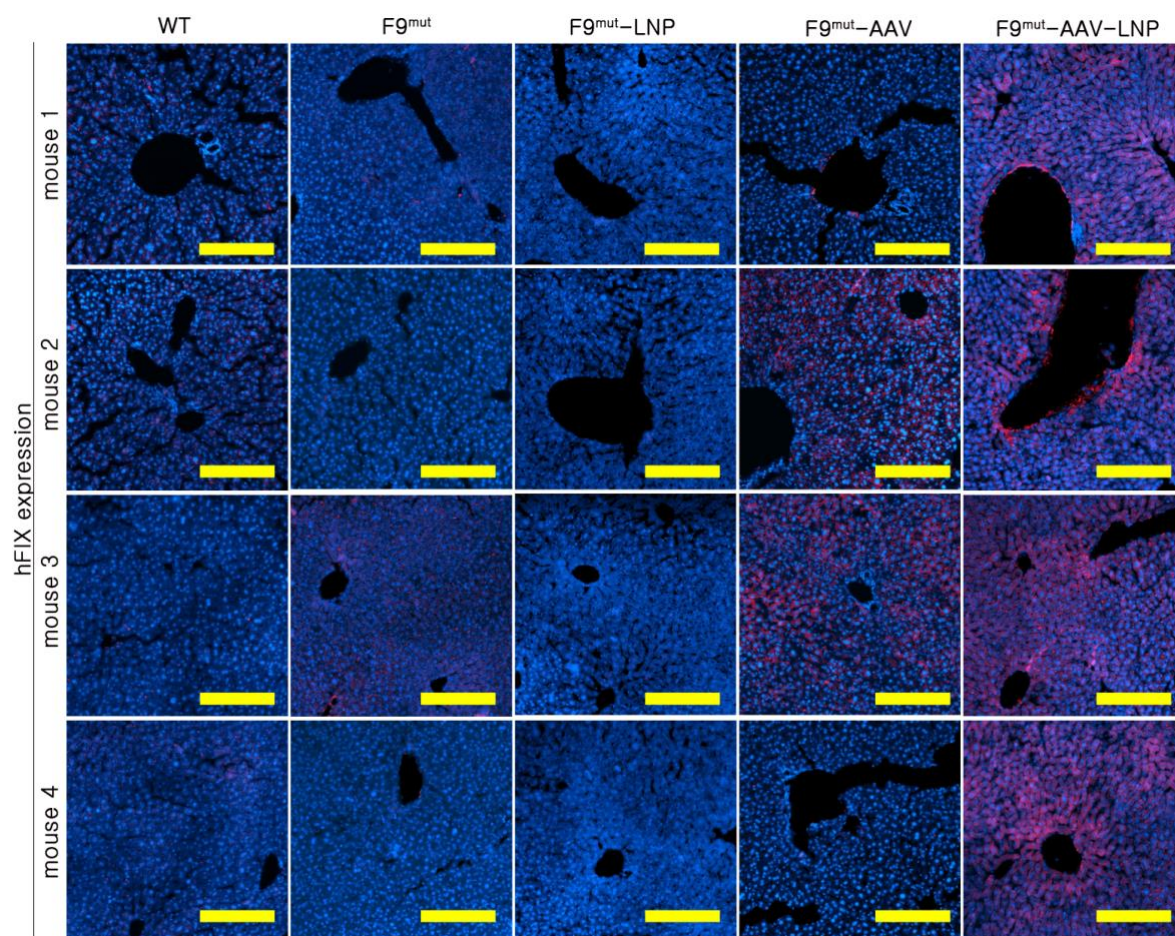

**Figure S3.** FIX detection after in vivo KI. The images confirm hFIX expression in different groups of mice, as detected using immunofluorescence. hFIX expression image of mouse 1 of each group is same as those shown in Figure 3E. Red color: hFIX, blue color: DAPI, yellow scale bar: 200  $\mu\text{m}$  (100x).

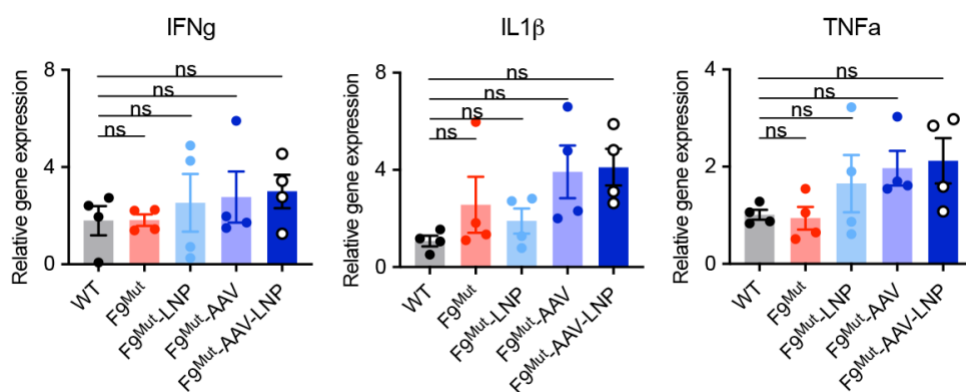

**Figure S4.** Relative gene expressions of Interferon- $\gamma$  (IFN $\gamma$ ), Tumor necrosis factor- $\alpha$  (TNF $\alpha$ ), and interleukin 1 $\beta$  (IL1 $\beta$ ) in liver tissue were calculated using qPCR. Gene expressions were normalized to that of the WT. (n = 4 per group). Data are presented as mean  $\pm$  standard error of mean, calculated using one-way ANOVA. NS: Not significant

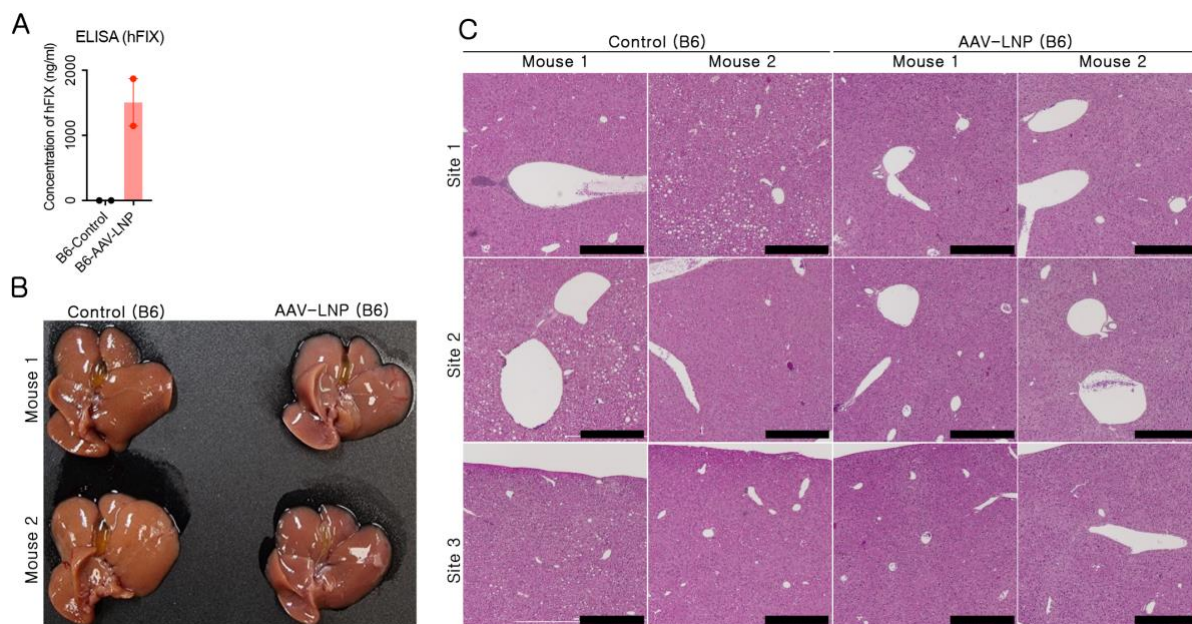

**Figure S5.** Screening of hepatocellular carcinoma. **A.** Mice after 26 months of AAV and LNP treatment were sacrificed, and blood hFIX concentration was analyzed for confirming *in vivo* hF9 KI. **B.** Comparison of the appearance of the liver of the control and AAV-LNP group. **C.** Hematoxylin-eosin staining image of 3 different sites from each mouse of control and AAV-LNP group. Black scale bar: 500  $\mu\text{m}$  (40x)

**Table S1.** Brief information regarding the whole genome sequencing and alignment

## Sequencing result

| Sample ID | Total reads <sup>a</sup> | Total bases <sup>b</sup> | GC base (%) <sup>c</sup> | Q20 (%) <sup>d</sup> | Q30 (%) <sup>e</sup> |
|-----------|--------------------------|--------------------------|--------------------------|----------------------|----------------------|
| Control_1 | 686,331,116              | 103,635,998,516          | 42.49%                   | 96.79%               | 92.46%               |
| hF9_KI_1  | 669,210,436              | 101,050,775,836          | 41.78%                   | 96.73%               | 92.42%               |
| hF9_KI_2  | 787,081,650              | 118,849,329,150          | 41.87%                   | 96.61%               | 92.08%               |
| hF9_KI_3  | 810,478,736              | 122,382,289,136          | 44.24%                   | 96.64%               | 92.29%               |

## Alignment result

| Sample ID | Mapped reads (%)     | Average depth | 1X (%) | 10X (%) | 20X (%) | 30X (%) |
|-----------|----------------------|---------------|--------|---------|---------|---------|
| Control_1 | 580,937,079 (99.39%) | 34.67         | 99.29% | 98.61%  | 93.89%  | 69.93%  |
| hF9_KI_1  | 572,393,399 (99.45%) | 33.42         | 99.29% | 98.92%  | 95.94%  | 67.31%  |
| hF9_KI_2  | 668,750,747 (99.45%) | 39.04         | 99.30% | 99.05%  | 97.67%  | 87.06%  |
| hF9_KI_3  | 666,038,794 (99.31%) | 41.36         | 99.00% | 92.63%  | 82.07%  | 68.96%  |

**Table S2.** On-target and off-target indel analysis

| Targets          |         | Chr. | Location<br>(mm39) | Sequence (5' to 3')                                | Related gene             | Indel<br>(WGS) |
|------------------|---------|------|--------------------|----------------------------------------------------|--------------------------|----------------|
| On-target        | On      | 1    | 160817065          | TGTGCATTTACCGCTCCCCTGGG                            | <i>Serpinc1</i>          | 20.12%         |
| Unbiased         | Di-Off1 | 4    | 115780188          | TGTACATTACCTCTCCCCTTGGG                            | Intron ( <i>Dmbx1</i> )  | ND             |
| off-target       | Di-Off2 | 9    | 56131003           | GGCTCTCCGCACCGGACCCGGTC                            | Intron (Peak1)           | ND             |
| candidate        |         |      |                    | CCGACGGG                                           |                          |                |
| site             | Di-Off3 | 10   | 69762079           | TATGCAAATACCCCTCCCCTTGG                            | Intergenic<br>(Ank3)     | ND             |
| <i>In silico</i> | Off1    | 4    | 115780189          | TGT <b>a</b> CATT <b>c</b> AC <b>c</b> tCTCCCCTTGG | Intron ( <i>Dmbx1</i> )  | ND             |
| off-target       | Off2    | 7    | 79730396           | TGTGC <b>a</b> cTTACCG <b>aa</b> CCCCTGGG          | Intron ( <i>Zfp710</i> ) | ND             |
| candidate        | Off3    | 9    | 42703562           | <b>Ta</b> TGCATTT <b>Ac</b> tGCT <b>Ca</b> CCTGGG  | Intron ( <i>Grik4</i> )  | ND             |
| site             | Off4    | 10   | 53628857           | TGTGCATTT <b>t</b> C <b>t</b> GCTCCC <b>t</b> TAAG | Intergenic               | ND             |
|                  | Off5    | 14   | 60055947           | TGTGCATTT <b>Aa</b> tGCTCCCC <b>a</b> TAG          | Intron ( <i>Atp8a2</i> ) | ND             |
|                  | Off6    | 18   | 53613104           | T <b>Ga</b> GCATTTACCG <b>C</b> tCCCTCAG           | Intron ( <i>Prdm6</i> )  | ND             |
|                  | Off7    | 18   | 86877140           | TGTGCATTT <b>Ac</b> <b>Gt</b> TCCC <b>a</b> TGGG   | Intergenic               | ND             |

Off-target candidate sites were selected by *in silico* design ([www.rgenome.net/cas-offfinder](http://www.rgenome.net/cas-offfinder)). Indel frequencies on the on- and off-target candidate sites were calculated based on the WGS experiment. (Bold lowercase letters: mismatch sequences with respect to the on-target sequence, ND: not detected).



**Table S3.** Random integration analysis

| Targets | Chr. | Location<br>(mm39) | CpG<br>island | Sequence (5' to 3')<br><u>Predicted-KI sequence</u> -Soft-clipped read | Related gene |
|---------|------|--------------------|---------------|------------------------------------------------------------------------|--------------|
| Off1    | 18   | 88880155           | CpG<br>island | <u>AAGTAGTGAC</u> - <b>hF9</b> -AGCATACTAG                             | Intergenic   |
| Off2    | 19   | 10282372           | CpG<br>island | <u>GCCGTCGCCA</u> - <b>Fragmented hF9</b> -<br>TGGTCACCGC              | Intergenic   |
| Off3    | 19   | 123564247          |               | <u>ACATACAAGG</u> - <b>Fragmented hF9</b> -<br>GGAGAATTTC              | Intergenic   |

As sequencing reads could not cover the whole KI region, opposite sequences from detected clipped reads were predicted based on the hF9 integration site (blue letters).

**Table S4** Sequences of primers used in this study

|      | Target gene                                  |   | Sequence (5'-3')                | Product size |                    |
|------|----------------------------------------------|---|---------------------------------|--------------|--------------------|
| qPCR | <i>Serpinc1</i>                              | F | 5'- GGCTGCTGGTGGAGAGGAAG-3'     | 129 bp       | Fig. 1B            |
|      |                                              | R | 5'- GGATTCACGGGGATGTCTCG-3'     |              |                    |
|      | <i>Protein C</i>                             | F | 5'- CCACCTGGGGAATATCTAGCA-3'    | 101 bp       | Fig. 1B            |
|      |                                              | R | 5'- GAAGCTGTTGGCACGTCTG-3'      |              |                    |
|      | <i>Tfpi</i>                                  | F | 5'- CAGGCGTCGGGATTATCGTG-3'     | 140 bp       | Fig. 1B            |
|      |                                              | R | 5'- TTCCCCACATCCAGTGTAGT-3'     |              |                    |
|      | <i>ITR for titration</i>                     | F | 5'- GGAACCCCTAGTGATGGAGTT-3'    | 62 bp        | Fig. S2            |
|      |                                              | R | 5'- CGGCCTCAGTGAGCGA-3'         |              |                    |
|      | <i>Tnf<math>\alpha</math></i>                | F | 5'- CCCTCACACTCAGATCATCTTCT-3'  | 61 bp        | Fig. S4            |
|      |                                              | R | 5'- GCTACGACGTGGGCTACAG-3'      |              |                    |
|      | <i>Ifn <math>\gamma</math></i>               | F | 5'- ATGAACGCTACACACTGCATC-3'    | 182 bp       | Fig. S4            |
|      |                                              | R | 5'- CCATCCTTTTGCCAGTTCCTC-3'    |              |                    |
|      | <i>Il1<math>\beta</math></i>                 | F | 5'- GAAATGCCACCTTTTGACAG-3'     | 116 bp       | Fig. S4            |
|      |                                              | R | 5'- TGGATGCTCTCATCAGGACA-3'     |              |                    |
|      | <i>Gapdh</i>                                 | F | 5'- AGGTCGGTGTGAACGGATTTG -3'   | 231 bp       | Fig. 1B, S2,<br>S4 |
|      |                                              | R | 5'- TGTAGACCATGTAGTTGAGGTCA -3' |              |                    |
| PCR  | <i>Serpinc1</i><br>( <i>Indel analysis</i> ) | F | 5'- CATTCTCTTACCCATTTTCGCC -3'  | 952 bp       | Fig. 2D            |
|      |                                              | R | 5'- CTGTCTCTAACCCCACTTCC -3'    |              |                    |
| PCR  | <i>KI-Left</i>                               | F | 5'- GGATGGGGAGTCATGGTT -3'      | 987 bp       | Fig. 3A, 3B        |
|      |                                              | R | 5'- GGTGCTCTGGGTGATGTT-3'       |              |                    |
|      | <i>KI-Right</i>                              | F | 5'- AAGCCAAAGGGACACCAA-3'       | 1040 bp      | Fig. 3A,3B         |
|      |                                              | R | 5'- CTGTCTCTAACCCCACTTCC -3'    |              |                    |

F: Forward; R: Reverse

**Table S5.** Character information of LNP used in this study

|     | Encapsulation<br>efficiency (%) | Size (nm) | PDI    | Zeta potential (mV) |
|-----|---------------------------------|-----------|--------|---------------------|
| LNP | 82.3                            | 93.24     | 0.0095 | -2.48               |

PDI: polydispersity index

**Table S6.** Information on the ELISA kits used in this study

|           | Name                                  | Sample type  | Sample dilution                    | Company (Cat number)   |
|-----------|---------------------------------------|--------------|------------------------------------|------------------------|
| ELISA kit | Human Factor IX                       | Cell protein | 7.5µg protein per well loaded(PBS) | Abcam(ab108831)        |
|           |                                       | Plasma       | 1:400<br>(Dilution buffer)         |                        |
|           | Mouse Antithrombin                    | Plasma       | 1:16000<br>(Dilution buffer)       | Abcam(ab108800)        |
| Assay kit | ALT Activity                          | Plasma       | 1:3<br>(Dilution buffer)           | APExBIO<br>(K2170-100) |
|           | Colorimetric/Fluorometric             |              |                                    |                        |
|           | AST Activity Colorimetric             | Plasma       | 1:3<br>(Dilution buffer)           | APExBIO<br>(K2171-100) |
|           | Factor IXa Activity<br>(Fluorometric) | Plasma       | 1:5<br>(Assay buffer)              | Abcam(ab204727)        |

**Table S7.** List of antibodies used in this study

|                      | Target                                | Clone      | Host   | Dilution   | Company (Cat number)    |
|----------------------|---------------------------------------|------------|--------|------------|-------------------------|
| Primary antibodies   | FIX/PTC                               | Polyclonal | Rabbit | 1:150 (IF) | Abcam(ab97619)          |
|                      | Ki67                                  | Monoclonal | Rat    | 1:100 (IF) | eBioscience(14-5698-82) |
| Secondary antibodies | Anti-Rabbit IgG<br>(Alexa Fluor™ 594) |            | Goat   | 1:400 (IF) | Invitrogen(A11012)      |
|                      | Anti-Rat IgG<br>(Alexa Fluor™ 488)    |            | Goat   | 1:200 (IF) | Invitrogen(A11006)      |
